# Supplementary material
Source: PubMed Central journal article supplement (PMC3815873)
Supplement: mbt0005-0607-SD1.pdf [file mbt0005-0607-SD1.pdf]

1 **Supplementary material MICROBIO-2010-019 (revised)**

2 **Experimental procedures**

3 *Media, culture conditions, and acquisition of scatter patterns for Vibrio species*

4 The bacterial cultures used (Table 1) were prepared as follows unless otherwise stated.  
5 Cultures from frozen stock were grown in tryptic soy broth (TSB) containing 1% sodium chloride  
6 (NaCl) for 18–24 h at 30°C and subcultured in brain-heart infusion broth (Acumedia, Neogen,  
7 MI) containing 1% NaCl (BHI-NaCl). The cultures were serially diluted and spread-plated on the  
8 surface of BHI-NaCl agar (BHI-NaCl with 1.5% agar), Heart Infusion (HI: Acumedia), or *Vibrio*  
9 *selective Thiosulphate Citrate Bile salts Sucrose (TCBS; Acumedia)* plates to obtain 30-100  
10 colonies per plate. The plates were incubated at 30°C until the diameter of each colony reached  
11  $1.3 \pm 0.2$  mm (typically 12-18 h). Since growth rates are variable among species, colony size  
12 was used as a fixed parameter. Scatter patterns of colonies were acquired and images were  
13 analyzed using the BARDOT (Advanced Bioimaging Systems, West Lafayette, IN). The identity  
14 of bacterial cultures was confirmed by Gram-staining, testing with API 20E (BioMerieux,  
15 Hazelwood, MO), and 16S rDNA sequencing.

16 *Bacterial confirmation by 16S rDNA sequencing*

17 Cultures of *Vibrio* species (Table 1) were confirmed by 16s rDNA sequencing of PCR-amplified  
18 products (Nilsson *et al.*, 2003). 16S rDNA-specific primer pairs, UFUL and URUL were used to  
19 amplify the target gene. The PCR conditions include: an initial denaturation at 94°C for 2 min,  
20 followed by 30 cycles consisting of 94°C for 1 min, 55°C for 1 min, and 72°C for 1 min, and final  
21 extension at 72°C for 5 min. PCR products were sequenced at the Purdue Genomics Core

22 Facility (Purdue University, W. Lafayette, IN) and the 16S rDNA nucleotide sequences were  
23 compared to the NCBI database by BLAST search (<http://blast.ncbi.nlm.nih.gov/Blast.cgi>).

#### 24 *Effect of physiological stress on forward light scattering patterns*

25 Cultures of *V. parahaemolyticus* CECT511, *V. vulnificus* MLT362, and *V. anguillarum* were  
26 subjected to the following stresses for 3 h: low pH (4.0), osmotic stress (5% NaCl), or heat  
27 stress (42°C)(Hahm and Bhunia, 2006). Overnight cultures were inoculated into BHI-NaCl broth  
28 after adjusting to pH 4.0 using concentrated HCl or into BHI broth containing 5% NaCl and held  
29 at 30°C for 3 h. For heat stress, cultures in BHI-NaCl broth were incubated at 42°C for 3 h. Each  
30 culture was washed and resuspended in 20 mM phosphate buffered saline (PBS, pH 7.2) and  
31 plated onto BHI-NaCl agar plates for BARDOT analysis.

#### 32 *Detection of bacteria recovered from viable but non-culturable (VBNC) state*

33 VBNC state in *V. vulnificus* strains (MLT 362 and MLT 364) were achieved by following  
34 procedure described before (Smith and Oliver, 2006). Briefly, cultures were grown in HI broth at  
35 room temperature (RT) for 24 h with agitation, subcultured in HI until log phase ( $OD_{610} = 0.13-$   
36  $0.2$ ), and inoculated into pre-chilled (4°C) ½ strength artificial sea water (ASW; (NaCl 24.7g/L,  
37 KCL 0.67g/L, CaCl·H<sub>2</sub>O 1.36g/L, MgCl<sub>2</sub>·6H<sub>2</sub>O 4.66g/L, MgSO<sub>4</sub>·7H<sub>2</sub>O 6.29g/L, NaHCO<sub>3</sub> 0.18g/L)  
38 (Wolf and Oliver, 1992) and maintained under that condition. Entrance to VBNC state was  
39 monitored by analyzing 0.1 ml of the sample (serially diluted in ASW) by plating on HI agar  
40 plates and by staining cells by LIVE/DEAD stain (BacLight stain kit: Molecular Probes). When  
41 no culturable cells were detected in 0.1 ml test sample, then 5 ml sample was passed through a  
42 0.22 um nucleopore filter, placed on HI and TCBS agar plates for 2 h then aseptically removed.  
43 Plates were incubated at RT for 24 h and monitored for growth. Cultures were deemed VBNC  
44 when there was less than 0.1 CFU/ml for each strain (Fig. S2). To resuscitate cells, cultures (5

45 ml) were incubated at RT for 24 h, plated on HI and TCBS, incubated at 30°C for about 12 h  
46 and analyzed by BARDOT.

47 *Application of BARDOT to detect and identify Vibrio from oyster and water samples*

48 Two dozen oysters (prime grade) from North Atlantic coast were purchased from a local fish  
49 monger and transported on ice to the laboratory. Six oysters were discarded because they  
50 were either too small or dead. Upon arrival they were placed immediately inside a clear plastic  
51 bag and kept in ASW for 30 min. Oysters were rinsed in deionized water, scrubbed, and washed  
52 in 70% ethanol, and divided into two groups (9 per group): control and experimental, and placed  
53 in two separate 5-gallon bucket containing 7 L sterile ASW, and continually aerated with flowing  
54 air. After 2 h, the experimental group received mixed (1:1) culture of *V. vulnificus* MLT 364 and  
55 *V. parahaemolyticus* CETT5711 to obtain a final concentration of 10<sup>5</sup> CFU/ml and both groups  
56 were maintained at RT for 24 h with aeration. Active filtering by oysters were noticed as the  
57 ASW became cloudy then cleared multiple times. Tissue and liquor from each oyster were  
58 harvested, weighed, placed in stomacher bag built with filter mesh (Nasco Whirlpak<sup>®</sup>, Fort  
59 Atkins, WI) containing alkaline peptone water (pH 8.5) with 1% peptone (Becton Dickinson) to  
60 achieve 1:10 dilution, homogenized (for 2 min in a stomacher; Seward, Norfolk, UK) and  
61 incubated at 30°C for 6 h. Enriched samples were diluted, plated on TCBS and HI, incubated at  
62 30°C for 12 h, and plates were scanned by BARDOT. Colony scatter images were compared  
63 with scatter image library consisting of *V. vulnificus*, and *V. parahaemolyticus*. Select colonies  
64 from representative plates were further verified by colony PCR using primers specific for *V.*  
65 *vulnificus* and *V. parahaemolyticus* described below. Entire oyster experiment was conducted  
66 under a biosafety cabinet.

67 Similarly, *V. parahaemolyticus* CECT511 was also inoculated into 500 ml sterile tap  
68 water at about 2 × 10<sup>3</sup> CFU/ml and the samples were passed through a membrane filtration

69 system using 0.45- $\mu$ m filters (Millipore). The filter was then placed in a centrifuge tube with 10  
70 ml sterile PBS, vortexed for 2 min, and centrifuged at 5000  $\times$  g for 10 min. The cell pellet was  
71 resuspended in 100  $\mu$ l PBS and plated onto BHI-NaCl agar. Plates were incubated at 30°C for  
72 12 h or until colony size reached  $1.3 \pm 0.2$  mm, and colonies were subsequently analyzed using  
73 BARDOT.

#### 74 *PCR verification of vibrios*

75 Polymerase chain reactions were used to confirm the identity of colonies on BHI-NaCl plates.  
76 Colonies of *V. parahaemolyticus* were confirmed by using VPM1 and VPM2 primers specific for  
77 the metalloprotease gene (Luan *et al.*, 2007). *V. vulnificus* was confirmed by using Cyt1 and  
78 Cyt2 primers targeting the hemolysin/cytolysin gene (Morris *et al.*, 1987). A standard  
79 amplification condition was used consisting of initial denaturation at 94°C for 2 min, followed by  
80 30 cycles of 94°C for 1 min, 58°C for 1 min, and 72°C for 1 min, and final extension at 72°C for  
81 5 min. The amplicons were analyzed by agarose gel electrophoresis.

#### 82 *Pattern analysis and classification*

83 Each scatter signature was analyzed using an automated pattern processing and classification  
84 system (Bayraktar *et al.*, 2006, Banada *et al.*, 2009), which accompanied the BARDOT  
85 hardware. A set of radial orthogonal pseudo-Zernike polynomials, as well as Haralick texture  
86 features, was computed for every scatter pattern. The feature reduction and selection procedure  
87 was based on three independent wrappers whose output was combined. One hundred ninety  
88 features were analyzed using sequential floating forward selection (SFFS), which is a  
89 combination of the sequential forward and the sequential backward methods. The SFFS-based  
90 wrapper was used with the k-nearest neighbor, LDA, and recursive-portioning algorithms. The  
91 number of selected features was 23.

92 Subsequently, the selected best features were used to train the pattern-recognition system.  
93 Three different classifiers were used: linear Fisher's discriminant (LFD), support vector machine  
94 with linear kernel (SVM-L), and support vector machine with radial-basis function kernel (SVM-  
95 RBF). The classifiers were optimized using standard 10x cross-validation. The quality of  
96 detection and classification was evaluated by computing values of sensitivity and specificity, and  
97 area under receiver operating curve (AUC).

98 For the purpose of supervised classification four classes were created: *V. cholerae*, *V.*  
99 *parahaemolyticus*, *V. vulnificus*, and "Mixture" class containing colonies of *V. alginolyticus*, *V.*  
100 *anguillarum*, *V. mimicus*, and *V. orientalis*. The classifiers were optimized to detect and  
101 recognize patterns belonging to three important classes of known pathogens: *V. cholerae*, *V.*  
102 *parahaemolyticus*, and *V. vulnificus*.

## 103 References

- 104  
105 Banada, P. P., Huff, K., Bae, E., Rajwa, B., Aroonual, A., Bayraktar, B., *et al.* (2009) Label-free  
106 detection of multiple bacterial pathogens using light-scattering sensor, *Biosensors and*  
107 *Bioelectronics* **24**: 1685-1692.  
108  
109 Bayraktar, B., Banada, P. P., Hirleman, E. D., Bhunia, A. K., Robinson, J. P., and Rajwa, B.  
110 (2006) Feature extraction from light-scatter patterns of *Listeria* colonies for identification  
111 and classification, *Journal of Biomedical Optics* **11**: 34006.  
112  
113 Hahm, B. K., and Bhunia, A. K. (2006) Effect of environmental stresses on antibody-based  
114 detection of *Escherichia coli* O157:H7, *Salmonella enterica* serotype Enteritidis and  
115 *Listeria monocytogenes*, *Journal of Applied Microbiology* **100**: 1017-1027.  
116  
117 Luan, X. Y., Chen, J. X., Zhang, X. H., Jia, J. T., Sun, F. R., and Li, Y. (2007) Comparison of  
118 different primers for rapid detection of *Vibrio parahaemolyticus* using the polymerase  
119 chain reaction, *Letters in Applied Microbiology* **44**: 242-247.  
120  
121 Morris, J. G., Wright, A. C., Roberts, D. M., Wood, P. K., Simpson, L. M., and Oliver, J. D.  
122 (1987) Identification of environmental *Vibrio vulnificus* isolates with a DNA probe for the  
123 cytotoxin hemolysin gene, *Applied and Environmental Microbiology* **53**: 193-195.  
124  
125 Nilsson, W. B., Paranjypte, R. N., DePaola, A., and Strom, M. S. (2003) Sequence  
126 polymorphism of the 16S rRNA gene of *Vibrio vulnificus* is a possible indicator of strain  
127 virulence, *J Clin Microbiol* **41**: 442-446.

128  
129 Smith, B., and Oliver, J. D. (2006) In Situ and In Vitro Gene Expression by *Vibrio vulnificus*  
130 during Entry into, Persistence within, and Resuscitation from the Viable but  
131 Nonculturable State, *Appl Environ Microbiol* **72**: 1445-1451.  
132  
133 Wolf, P. W., and Oliver, J. D. (1992) Temperature effects on the viable but non-culturable state  
134 of *Vibrio vulnificus*, *FEMS Microbiol Ecol* **101**: 33-39.  
135  
136  
137

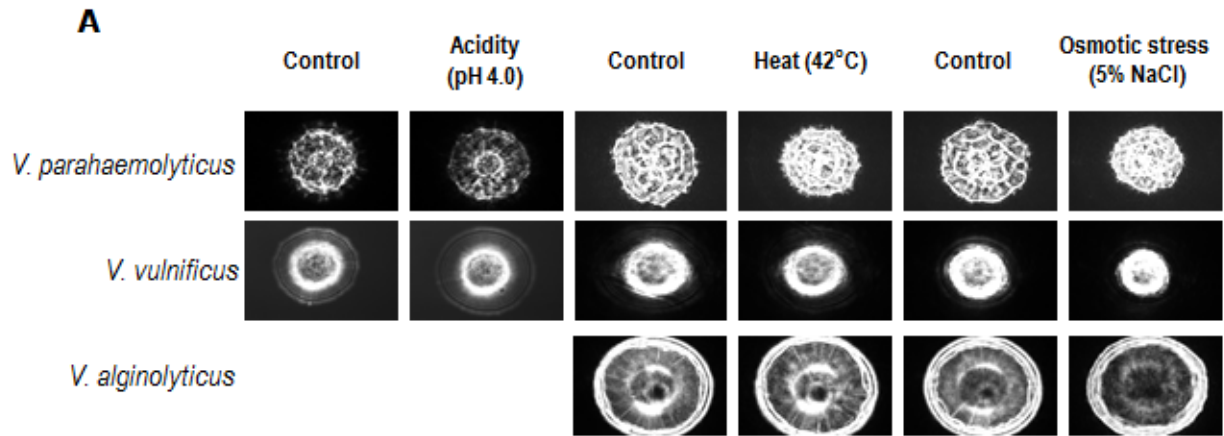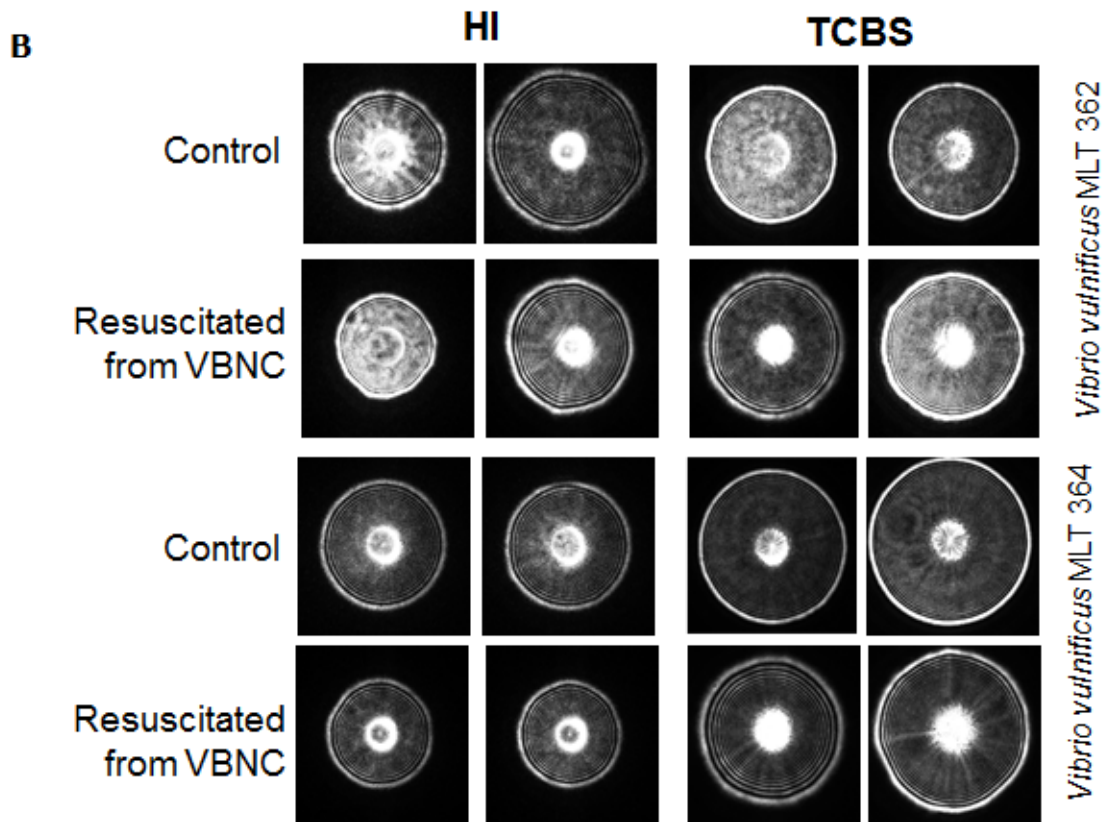

138

139

140 **Fig. S1.** (A) Scatter images of resuscitated colonies of *Vibrio* species that were exposed to  
 141 various stresses (pH [4.0], heat [42°C] and osmotic [5% NaCl]) for 3 h. Cultures were exposed  
 142 to stress, serially diluted and plated onto BHI containing 1% NaCl, and allowed to grow for 12 h  
 143 before scatter images were acquired. (B) Scatter images of *V. vulnificus* MLT 362 and  
 144 recovered from viable but non-culturable (VBNC) state.

**A**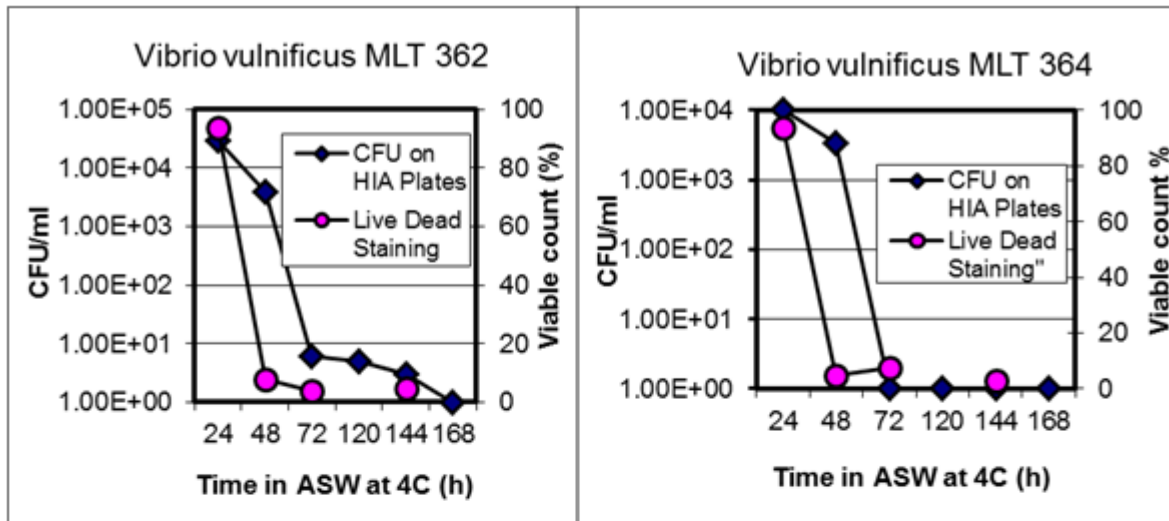**B**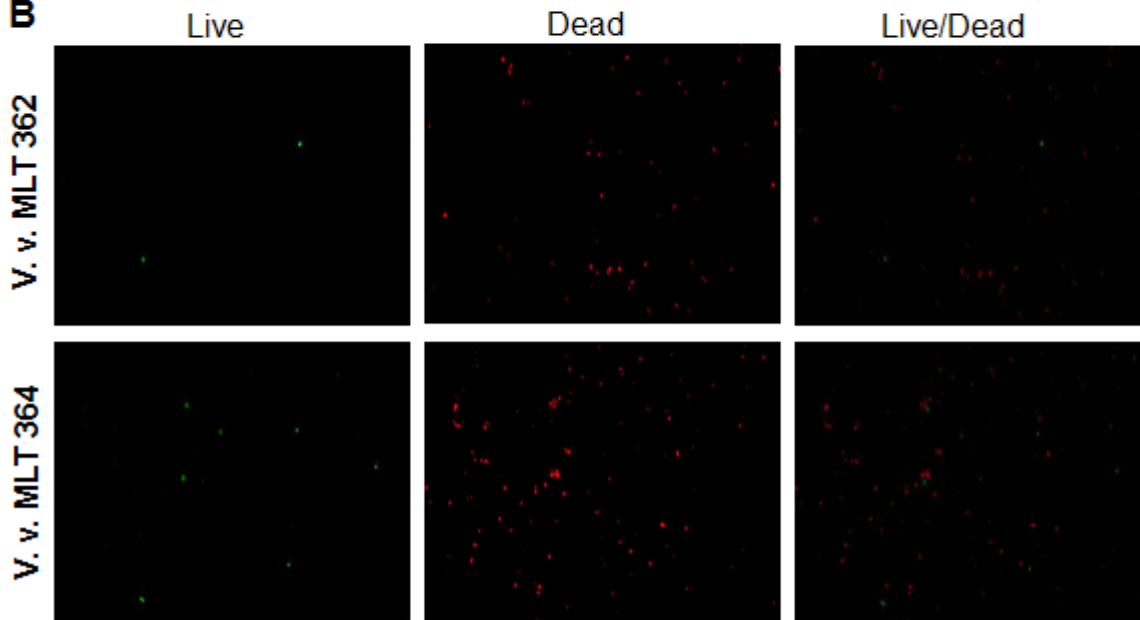**T=48 h in 4°C ASW**

145

146 **Fig. S2.** (A) Induction of VBNC state in *V. vulnificus* MLT 362 and 364 strains suspended in  
 147 artificial sea water (ASW). (A) Viable cell counts were determined by plating on HI agar (HIA)  
 148 plates and by staining cells with BacLight LIVE/DEAD staining kit. (B) Fluorescence microscopic  
 149 analysis of live, dead and live/dead *V. vulnificus* cells taken at 48 h indicating <1% cells are still  
 150 viable at that condition and are entering into VBNC state.

151



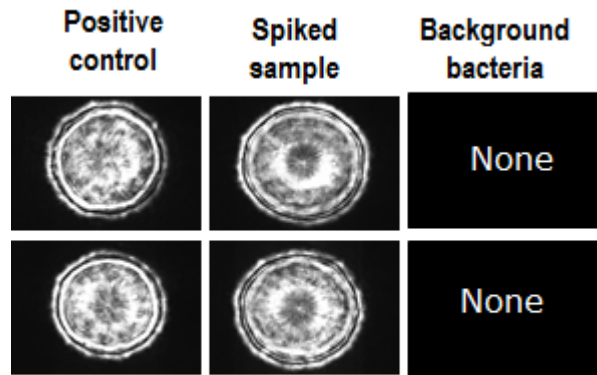

*V. parahaemolyticus* in water

152

153 **Fig. S3.** Detection of *V. parahemolyticus* on BHI-NaCl agar plate from spiked water sample  
 154 using BARDOT.  
 155
